# THE AMERICAN JOURNAL OF PSYCHIATRY

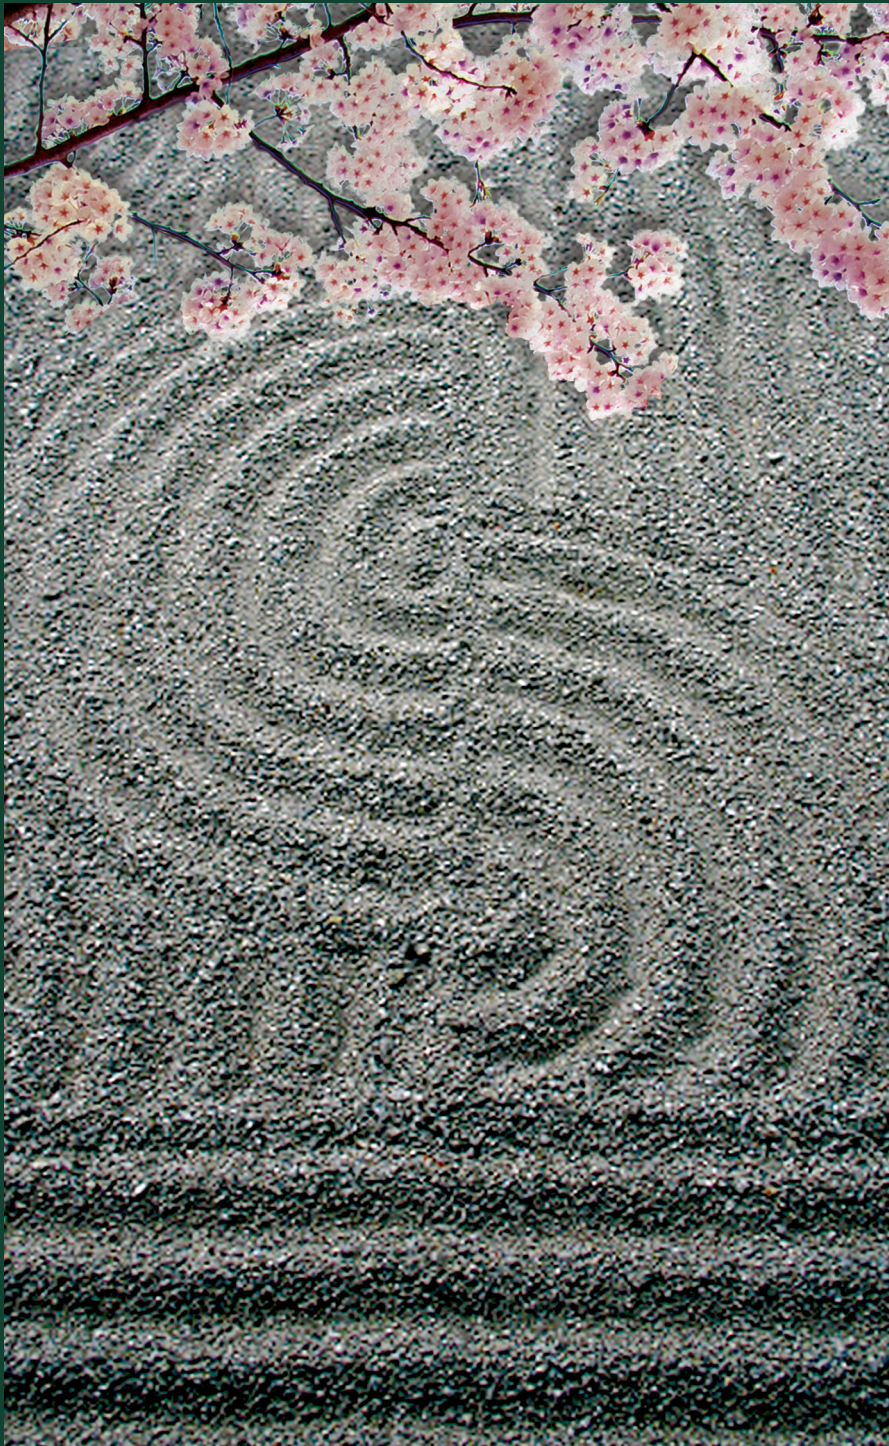

## **Guns, Adolescents, and Mental Illness**

Nora K. McNamara and  
Robert L. Findling

190

## **Impact of Clinical Training on Violence Risk Assessment**

Dale E. McNiel et al.

195

## **The MATRICS Consensus Cognitive Battery, Part 1: Test Selection, Reliability, and Validity**

Keith H. Nuechterlein et al.

203

## ◀ **Symptom Structure in Japanese Patients with Obsessive- Compulsive Disorder**

Hisato Matsunaga et al.

251

## **Continuing Medical Education**

289

**February 2008**

**Volume 165 • Number 2**

---

Official Journal of the  
AMERICAN PSYCHIATRIC ASSOCIATION

---

[ajp.psychiatryonline.org](http://ajp.psychiatryonline.org)

# New Feature for Residents!

## The American Journal of Psychiatry Residents' Journal

A FREE electronic publication produced specifically for psychiatry residents

The Residents' Journal contains special links to full text of the articles from the current *American Journal of Psychiatry* and to AJP Audio, a downloadable MP3 file featuring highlights from the issue. In addition, this e-mail bulletin contains two exclusive features:

### Journal Club Kit

A featured article presented with an overview discussing the reasons for its selection, discussion questions, and an editorial by a senior member of the field placing the article into clinical context.

### Educational Article

Case presentation that illustrates a major point in clinical practice or highlights unique treatment approaches.

Plus lively contributions from your fellow residents:

- Instructive cases
- Unique clinical or educational programs
- Perspectives on training and career development
- Discussions arising from journal club discussions

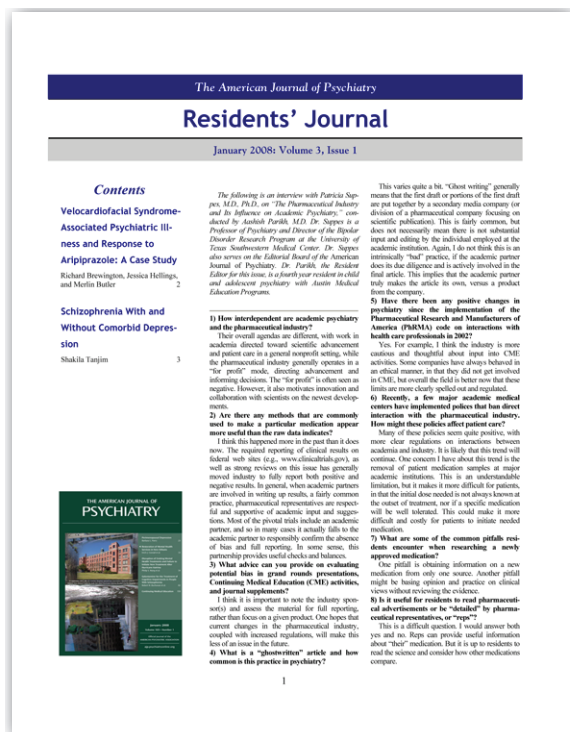

The Resident's Journal is sent free-of-charge to all psychiatry residents. Anyone interested in being included on the distribution list should contact Lisa Devine, the Residents' Journal staff editor at [ajp@psych.org](mailto:ajp@psych.org) with "Subscribe to Residents' Journal" in the subject line.

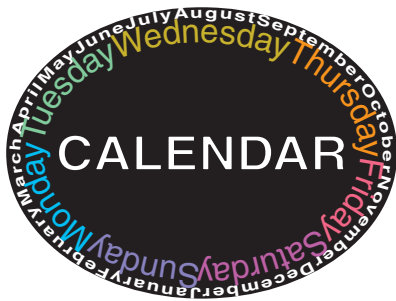

For free listing of your organization's official annual or regional meeting, please send us the following information: sponsor, location, inclusive dates, type and number of continuing education credits (if available), and the name, address, and telephone number of the person or group to contact for more information. In order for an event to appear in our listing, all notices and changes must be received at least 6 months in advance of the meeting and should be addressed to:

*Calendar, American Journal of Psychiatry, 1000 Wilson Boulevard, Suite 1825, Arlington, VA 22209-3901, jblair@psych.org (e-mail).*

*Because of space limitations, only listings of meetings of the greatest interest to Journal readers will be included.*

## FEBRUARY 2008

**February 27–March 2**, Annual meeting of the American College of Psychiatrists, Kauai, Hawaii. Contact: American College of Psychiatrists, 122 S. Michigan Ave., Ste. 1360, Chicago, IL 60603; (312) 662-1020 (tel), (312) 662-1025 (fax), maureen@acpsych.org (e-mail).

## MARCH

**March 1–4**, 19th Annual Meeting of the American Neuropsychiatric Association, Savannah, GA. Contact: ANPA Office; (614) 447-2077 (tel), (614) 263-4366 (fax), anpa@osu.edu (e-mail), www.anpaonline.org (web site).

**March 14–17**, 21st Annual Meeting of the American Association for Geriatric Psychiatry, Orlando. Contact: AAGP, 7910 Woodmont Ave., Ste. 1050, Bethesda, MD 20814-3004; (301) 654-7850 (tel), (301) 654-4137 (fax), www.aagpmeeting.org (web site).

**March 15**, 7th Annual Women's Mental Health Symposium, Tucson, AZ. Contact: Professional Development Office, University of Arizona College of Medicine, Department of Psychiatry, PO Box 245002, 1501 N. Campbell Ave. #7423, Tucson, AZ 85724-5002; (520) 626-1392 (tel), (520) 626-5732 (fax), uapsycon@email.arizona.edu (e-mail), www.psychiatry.arizona.edu (web site).

**March 26–29**, Annual Meeting and Scientific Sessions of the Society of Behavioral Medicine, San Diego. Contact: Society of Behavioral Medicine, 17000 Commerce Parkway, Ste. C, Mount Laurel, NJ 08054; (856) 439-1297 (tel), (856) 439-0525 (fax), info@sbm.org (e-mail).

## APRIL

**April 4–5**, The Seventh Annual Pharmacogenetics in Psychiatry Meeting, New York, NY. Contact: Patricia Raikos, The Zucker Hillside Hospital, 75-59 263rd Street, Glen Oaks, NY 11004; (718) 470-8418 (tel), (718) 343-1659 (fax), praikos@nshs.edu (e-mail), www.pharmacogeneticsinpsychiatry.com (web site).

**April 5–9**, 16th European Congress of Psychiatry, Nice, France. Contact: Congress Secretariat, Kenes International, 17 Rue du Cendrier, PO Box 1726, CH-1211 Geneva 1, Switzerland; (41) 22 908 0488 (tel), (41) 22 732 2850 (fax), aep@kenes.com (e-mail).

## MAY

**May 1–4**, The 52nd Annual Meeting of the American Academy of Psychoanalysis and Dynamic Psychiatry, Washington, DC. Contact: Executive Office, American Academy of Psychoanalysis and Dynamic Psychiatry, P. O. Box 30, Bloomfield, CT 06002; (888) 691-8281 (tel), (860) 286-0787 (fax), info@aapdp.org (e-mail) www.aapdp.org (web site).

**May 3–4**, American Academy of Psychiatry and the Law Semiannual Meeting, Washington, D.C. Contact: One Regency Drive, PO Box 30, Bloomfield, CT 06002-0030; (800) 331-1389, (tel) (860) 286-0787 (fax), execoff@aapl.org (e-mail).

**May 3–8**, 161st Annual Meeting of the American Psychiatric Association, Washington, DC. Contact: Cathy Nash, APA Annual Meetings Dept., 1000 Wilson Blvd., Ste. 1825, Arlington, VA 22209; (703) 907-7822.

**May 11–14**, World Psychiatric Association Epidemiology & Public Health Section Meeting, Saskatoon, Saskatchewan. Contact: Karen E. Mosier, Saskatchewan Health Organization for Research and Evaluation (SHORE), Department of

Psychiatry, Ellis Hall, Room 110; (306) 966-1840 (tel), (306) 966-8761 (fax), karen.mosier@usask.ca (e-mail), http://www.medicine.usask.ca/psychiatry/wpa2008/.

**May 29–31**, International Congress of Dual Pathology 2008, Madrid. Contact: Technical Secretariat, Tilesa OPC, Londres, 17 - 28028, Madrid, Spain; (34) 91 361 12600 (tel), (34) 91 355 9208, secretariat@cipd2008.com (e-mail), www.cipd2008.com (web site).

## JUNE

**June 18–22**, American Psychoanalytic Association 97th Annual Meeting, Atlanta, GA. Contact: Dottie Jeffries, Director of Public Affairs, 212-752-0450 x29 (tel), djeffries@apsa.org (e-mail).

**June 19–21**, Thematic Conference on Depression and Relevant Psychiatric Condition in Primary Care, Granada, Spain. Contact: Francisco Torres-González, Andalusian Research Group on Mental Health, University of Granada, Avenida de Madrid 11, Granada 18071, Spain; (34) 958-272651 (tel), (34) 958-275214 (fax), ftorres@ugr.es (e-mail).

## OCTOBER

**October 2–5**, 60th Institute on Psychiatric Services, American Psychiatric Association, Chicago, IL. Contact: Jill Gruber, APA Annual Meetings Dept., 1000 Wilson Blvd., Ste. 1825, Arlington, VA 22209; (703) 907-7815.

**October 28–November 2**, 55th Annual Meeting of the American Academy of Child and Adolescent Psychiatry, Chicago. Contact: AACAP, 3615 Wisconsin Avenue, N.W., Washington, DC 20016-3007; (202) 966-7300 (tel), (202) 966-2891 (fax), meetings@aacap.org (e-mail), www.aacap.org (web site).

*Continued on page A34*

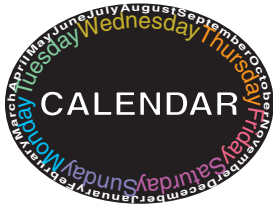

Continued from page A32

## NOVEMBER

**November 23–28**, Canadian Psychiatric Association 58th Annual Meeting, Vancouver, British Columbia, Canada. Contact: 260-441 MacLaren Street, Ottawa, ON K2P 2H3, Canada; (800) 267-1555 (tel), (613) 234-9857 (fax), cpa@medical.org (e-mail).

## FEBRUARY 2009

**February 25–March 1**, American College of Psychiatrists Annual Meeting, Tucson, AZ. Contact: 122 South Michigan Avenue, Suite 1360, Chicago, IL 60603; (312) 662-1020 (tel), (312) 662-1025 (fax), angel@ACPsych.org (e-mail).

## MAY

**May 16–21**, 162nd Annual Meeting of the American Psychiatric Association, San Francisco. Contact: Cathy Nash, APA Annual Meetings Dept., 1000 Wilson Blvd., Ste. 1825, Arlington, VA 22209; (703) 907-7822.

**FREE AUDIO!** *Have You Heard?*

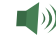

You can listen to highlights of *The American Journal of Psychiatry* by downloading a monthly free .mp3 audio file from our website (<http://ajp.psychiatryonline.org/misc/audio.dtl>) or by subscribing to the AJP Audio podcast at iTunes or other feed reader.

## Continuing Medical Education

Three articles in each issue provide an opportunity to earn up to 1 hour category 1 **CME** credit each by taking a course covering the content. Credit available online only with purchased subscription to AJP's CME program. Visit [cme.psychiatryonline.org](http://cme.psychiatryonline.org) for details.

## Coming in the March 2008 issue\*

### THE AMERICAN JOURNAL OF PSYCHIATRY

#### *Augmentation of Behavior Therapy With D-Cycloserine For Obsessive-Compulsive Disorder*

S. Wilhelm, U. Buhlmann, D. Tolin, S. Meunier, G. Pearlson, H. Reese, P. Cannistraro, M. Jenike, and S. Rauch

#### *Differences in Treatment Outcome in Outpatients With Anxious Versus Nonanxious Depression: A STAR\*D Report*

M. Fava, J. Rush, J. Alpert, G.K. Balasubramani, S. Wisniewski, C. Carmin,  
M. Biggs, S. Zisook, A. Leuchter, R. Howland, D. Warden, and M. Trivedi

#### *Metformin Addition Attenuates Olanzapine-Induced Weight Gain in Drug-Naive First-Episode Schizophrenic Patients: A Double Blind, Placebo-Controlled Study*

R. Wu, J. Zhao, X. Guo, Y. He, M. Fang, W. Guo, J. Chen, and L. Li

#### *Prevalence of Mental Illness in Immigrant and Non-Immigrant U.S. Latino Groups*

M. Alegria, G. Canino, P. Shrout, M. Woo, N. Duan, D. Vila, M. Torres, C. Chen, and X.-L. Meng

\*Can't wait? Visit [ajp.psychiatryonline.org](http://ajp.psychiatryonline.org) and click the "AJP in Advance" logo to see all articles uploaded in advance of print!

# Psychological Medicine

Volume 37 Number 12 December 2007

## CONTENTS

In this Issue 1679

### INVITED REVIEW

**Advances in genetic findings on attention deficit hyperactivity disorder** THAPAR, A., LANGLEY, K., OWEN, M.J., AND O'DONOVAN, M.C. 1681

### REVIEW ARTICLE

**The cognitive neuropsychology of depression in the elderly** HERRMANN, L.L., GOODWIN, G.M., AND EBMEIER, K.P. 1693

### ORIGINAL ARTICLES

**Reaction time performance in ADHD: improvement under fast-incentive condition and familial effects** ANDREOU, P., NEALE, B.M., CHEN, W., CHRISTIANSEN, H., GABRIELS, I., HEISE, A., MEIDAD, S., MULLER, U.C., UEBEL, H., BANASCHEWSKI, T., MANOR, I., OADES, R., ROEYERS, H., ROTHENBERGER, A., SHAM, P., STEINHAUSEN, H.-C., ASHERSON, P., AND KUNTSI, J. 1703

**Neuropsychological and behavioural disinhibition in adult ADHD compared to borderline personality disorder** LAMPE, K., KONRAD, K., KROENER, S., FAST, K., KUNERT, H.J., AND HERPERTZ, S.C. 1717

**Predictors, clinical characteristics, and outcome of conduct disorder in girls with attention-deficit/hyperactivity disorder: a longitudinal study** MONUTEAUX, M.C., FARAONE, S.V., GROSS, L.M., AND BIEDERMAN, J. 1731

**A naturalistic study of the effects of pharmacotherapy on substance use disorders among ADHD adults** FARAONE, S.V., BIEDERMAN, J., WILENS, T.E., AND ADAMSON, J. 1743

**Patterns of subjective memory impairment in the elderly: association with memory performance** JESSEN, E., WIESE, B., CVETANOVSKA, G., FUCHS, A., KADUSZKIEWICZ, H., KÖLSCH, H., LUCK, T., MÖSCH, E., PENTZEK, M., RIEDEL-HELLER, S., WERLE, J., WEYERER, S., ZIMMERMANN, T., MAIER, W., AND BICKEL, H. 1753

**Orbitofrontal cortex volume in late life depression: influence of hyperintense lesions and genetic polymorphisms** TAYLOR, W.D., MACFALL, J.R., PAYNE, M.E., MCQUOID, D.R., STEFFENS, D.C., PROVENZALE, J.M., AND KRISHNAN, K.R.R. 1763

**The association between C-reactive protein concentration and depression in later life is due to poor physical health: results from the Health in Men Study (HIMS)** ALMEIDA, O.P., NORMAN, P., HANKEY, G.J., JAMROZIK, K., AND FLICKER, L. 1775

**Prevalence of depression in older people in England and Wales: the MRC CFA Study** MCDUGALL, F.A., KVAAL, K., MATTHEWS, F.E., PAYKEL, E., JONES, P.B., DEWEY, M.E., AND BRAYNE, C. 1787

**Internet-based cognitive behavioural therapy for subthreshold depression in people over 50 years old: a randomized controlled clinical trial** SPEK, V., NYKLÍČEK, I., SMITS, N., CUIJPERS, P., RUPER, H., KEYZER, J., AND POP, V. 1797

**Religious involvement and depression in primary care elders** KING, D.A., LYNES, J.M., DUBERSTEIN, P.R., HE, H., TU, X. M., AND SEABURN, D.B. 1807

### BOOK REVIEWS

*The Frontal Lobes: Development, Function and Pathology* CLARK, L. 1817

*Handbook of Psychophysiology (3rd edn)* MEYE, F. J. AND DIGIROLAMO, G. J. 1818

*Corrigendum* 1796

*Announcement* 1820

*American Journal of Psychiatry Contents August 2007* 1821

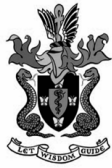

# THE BRITISH JOURNAL OF PSYCHIATRY

January 2008, VOL. 192

<http://bjp.rcpsych.org>

**A0 Editorial Board**

**A2 Highlights of this issue**

## Editorials

**1 A journal describing present undertakings, studies and labours of the ingenious**  
P. Tyrer

**3 Problems with the post-traumatic stress disorder diagnosis and its future in DSM-V**  
G.M. Rosen, R.L. Spitzer, and P.R. McHugh

## Review article

**5 Psychosocial interventions for the prevention of relapse in bipolar disorder: systematic review of controlled trials**  
S. Benyon, K. Soares-Weiser, N. Woolacott, S. Duffy, and J.R. Geddes

**11 Word pictures of depression: low mood**  
S. McConville

## Papers

**12 Late-life depression and mortality: influence of gender and antidepressant use**  
J. Ryan, I. Carriere, K. Ritchie, R. Stewart, G. Toulemonde, J.-F. Dartigues, C. Tzourio, and M.-L. Ancelin

**19 Neural correlates of reward in autism**  
N. Schmitz, K. Rubia, T. van Amelsvoort, E. Daly, A. Smith, and D.G.M. Murphy

**24 The adult I may have become**  
S. Swainston

**25 Brain activation in paediatric obsessive-compulsive disorder during tasks of inhibitory control**  
J. Woolley, I. Heyman, M. Brammer, I. Frampton, P. K. McGuire, and K. Rubia

**31 Word pictures of depression: thoughts of death**  
S. McConville

**32 Cortical activation in alexithymia as a response to emotional stimuli**  
H. Karlsson, P. Näätänen, and H. Stenman

**39 Symptoms and coping in Sri Lanka 20-21 months after the 2004 tsunami**  
M. Hollifield, C. Hewage, C.N. Gunawardena, P. Kodituwakku, K. Bopagoda, and K. Weerathnege on behalf of the International Post-Tsunami Study Group

**45 Non-traditional lifestyles and prevalence of mental disorders in adolescents in Goa, India**  
A. Pillai, V. Patel, P. Cardozo, R. Goodman, H.A. Weiss, and G. Andrew

**52 Development and reliability of a structured interview guide for the Montgomery-Åsberg Depression Rating Scale (SIGMA)**  
J.B.W. Williams and K.A. Kobak

**58 Insight—in 100 words**  
A.S. David

**59 Clinical referral patterns and cognitive profile in mild cognitive impairment**  
J.A. Lonie, L.L. Herrmann, C.L. Donaghey, and K.P. Ebmeier

## Short reports

**65 Callous and unemotional traits in children and adolescents living in Great Britain**  
P. Moran, T. Ford, G. Butler, and R. Goodman

**67 Facial affect recognition in individuals at clinical high risk for psychosis**  
J. Addington, D. Penn, S.W. Woods, D. Addington, and D.O. Perkins

## Columns

**69 Correspondence**

**72 Book reviews**

**77 Instructions to authors**

**80 Contents of the American Journal of Psychiatry**

**81 Contents of Advances in Psychiatric Treatment**

**82 From the Editor's desk**
