# THE AMERICAN JOURNAL OF PSYCHIATRY

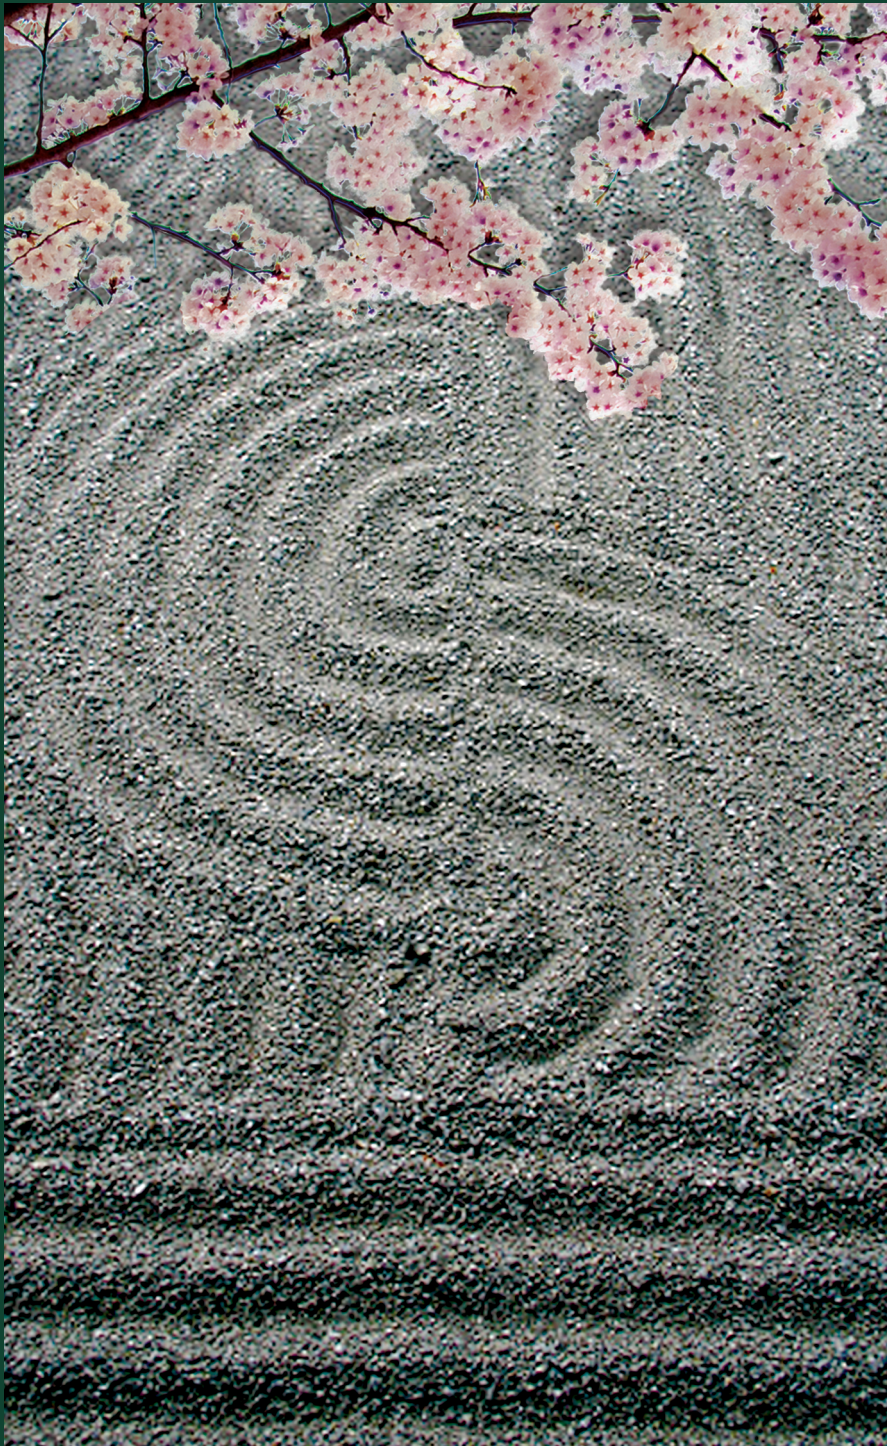

## **Guns, Adolescents, and Mental Illness**

Nora K. McNamara and  
Robert L. Findling

190

## **Impact of Clinical Training on Violence Risk Assessment**

Dale E. McNeil et al.

195

## **The MATRICS Consensus Cognitive Battery, Part 1: Test Selection, Reliability, and Validity**

Keith H. Nuechterlein et al.

203

## ◀ **Symptom Structure in Japanese Patients with Obsessive- Compulsive Disorder**

Hisato Matsunaga et al.

251

## **Continuing Medical Education**

289

**February 2008**

**Volume 165 • Number 2**

---

Official Journal of the  
AMERICAN PSYCHIATRIC ASSOCIATION

---

[ajp.psychiatryonline.org](http://ajp.psychiatryonline.org)
